# Supplementary material
Source: PubMed Central journal article supplement (PMC5400075)
Supplement: dew345suppl_data.pdf [file dew345suppl_data.pdf]

## RESULTS

The results of sex stratified models for paternal semen quality characteristics with continuous pregnancy outcomes are included in the [Supplementary Tables SI and SII](#). Among male births ( $n = 110$ ) ([Supplementary Table SI](#)), sperm head length was associated with lower birth weights ( $P = 0.02$ ), and % elongation factor ( $P = 0.02$ ) was associated with smaller head circumference, although higher birthweight was correlated to % elongation factor ( $P = 0.004$ ) and both sperm head elongation factor ( $P = 0.012$ ) and width ( $P = 0.03$ ) were associated with longer birth length. Earlier gestational age at delivery was associated with higher measures of sperm motility, including straight line velocity ( $P = 0.02$ ), amplitude head displacement ( $P = 0.001$ ) and % motility ( $P = 0.02$ ), as well as % acrosome of head ( $P = 0.003$ ), and % coiled tail was associated with later gestational age at delivery ( $P = 0.02$ ). Smaller head circumference was associated with sperm head length ( $P = 0.02$ ) and perimeter ( $P = 0.02$ ).

Among female births ( $n = 116$ ) ([Supplementary Table SII](#)), lower birth weights were associated with measures of normal morphology including % normal morphology (traditional criteria,  $P = 0.02$ ). Birthweight was positively associated with % high DNA stainability ( $P = 0.02$ ). Sperm head area was also associated with a larger infant head circumference ( $P = 0.04$ ), in addition to sperm perimeter ( $P = 0.02$ ), and higher % neck/midpiece abnormalities ( $P = 0.04$ ). Birth length was associated with higher sperm length ( $P = 0.04$ ) and lower % elongation factor ( $P = 0.01$ ), poorer morphology, including normal morphology (strict criteria,  $P = 0.01$ ; traditional criteria,  $P < 0.01$ ), amorphous ( $P = 0.05$ ) and % taper ( $P = 0.03$ ) sperm, neck/midpiece abnormalities ( $P = 0.003$ ), and cytoplasmic droplet ( $P < 0.001$ ). Birth length was also positively associated with both DNA fragmentation index ( $P = 0.02$ ) and high DNA stainability ( $P = 0.04$ ). Ponderal index was greater for higher sperm concentration ( $P = 0.04$ ) and % hypo-osmotic swelling test ( $P = 0.02$ ).
