# Supplementary material
Source: PubMed Central journal article supplement (PMC5400075)
Supplement: dew345suppl_tables.pdf [file dew345suppl_tables.pdf]

**Supplementary Table S1 Results of adjusted linear models assessing relation of semen quality<sup>a</sup> on pregnancy outcomes among male births (n = 110)**

| Semen analysis variable                         | BW (g)    | GA at delivery (weeks) | HC (cm) | BL (cm) | PI (100 × BL/BW <sup>3</sup> ) |
|-------------------------------------------------|-----------|------------------------|---------|---------|--------------------------------|
| General characteristics                         |           |                        |         |         |                                |
| Volume (ml)                                     | -23.91    | 0.08                   | -0.13   | -0.18   | 0.01                           |
| Sperm concentration (×10 <sup>6</sup> /ml)      | 0.58      | 0.00                   | 0.00    | 0.00    | 0.00                           |
| Total sperm count (×10 <sup>6</sup> /ejaculate) | 0.02      | 0.00                   | 0.00    | 0.00    | 0.00                           |
| Hypo-osmotic swollen (%)                        | -4.07     | -0.03                  | 0.01    | -0.04   | 0.00                           |
| Sperm motility (24 h)                           |           |                        |         |         |                                |
| Average path velocity (mm/s)                    | -6.74     | -0.01                  | -0.01   | -0.03   | 0.00                           |
| Straight line velocity (mm/s)                   | -7.41     | -0.04**                | 0.00    | -0.04   | 0.00                           |
| Curvilinear velocity (mm/s)                     | -2.98     | -0.01                  | -0.01   | -0.02   | 0.00                           |
| Amplitude head displacement (mm)                | -32.30    | -0.48***               | 0.09    | -0.30   | 0.02                           |
| Beat cross frequency (Hz)                       | -12.43*   | -0.03                  | 0.01    | -0.06   | 0.00                           |
| Straightness (%)                                | -1.64     | -0.01                  | 0.00    | -0.02   | 0.00                           |
| Linearity (%)                                   | -2.19     | -0.01                  | 0.00    | -0.03   | 0.00                           |
| Percent motility (%)                            | -5.71     | -0.04**                | 0.01    | -0.03   | 0.00                           |
| Sperm head measurements                         |           |                        |         |         |                                |
| Length (mm)                                     | -444.25** | -0.46                  | -1.76** | -1.29   | -0.14                          |
| Area (mm <sup>2</sup> )                         | -21.05    | -0.18                  | -0.39*  | 0.29    | -0.07*                         |
| Width (mm)                                      | 543.28*   | -0.26                  | 0.49    | 3.68**  | -0.16                          |
| Elongation factor (%)                           | 29.28***  | 0.02                   | 0.08*   | 0.14**  | 0.00                           |
| Perimeter (mm)                                  | -143.20   | -0.46                  | -0.97** | -0.06   | -0.10                          |
| Acrosome area of head (%)                       | -10.92    | -0.11***               | -0.07   | -0.05   | 0.00                           |
| Morphology                                      |           |                        |         |         |                                |
| Strict criteria (%)                             | 5.81      | -0.04*                 | -0.01   | 0.01    | 0.00                           |
| Traditional normal (%)                          | 4.96      | -0.04*                 | 0.00    | 0.02    | 0.00                           |
| Amorphous (%)                                   | -6.09     | 0.02                   | 0.01    | -0.02   | 0.00                           |
| Round (%)                                       | -40.10    | 0.31*                  | -0.35*  | -0.15   | 0.00                           |
| Pyriiform (%)                                   | -16.60*   | -0.02                  | -0.07*  | -0.06   | 0.00                           |
| Bicephalic (%)                                  | 1.28      | -0.04                  | 0.11    | 0.14    | -0.02                          |
| Taper (%)                                       | -19.85    | 0.03                   | -0.06   | -0.09   | 0.00                           |
| Megalo head (%)                                 | -1.53     | 0.00                   | 0.06    | 0.01    | 0.00                           |
| Micro head (%)                                  | 44.36     | 0.25                   | 0.22    | 0.18    | 0.02                           |
| Neck/midpiece abnormalities (%)                 | -4.59     | 0.02                   | -0.02   | -0.03   | 0.00                           |
| Coiled tail (%)                                 | 2.78      | 0.04**                 | 0.01    | 0.00    | 0.00                           |
| Other tail abnormalities (%)                    | -6.70     | -0.07                  | 0.01    | -0.05   | 0.00                           |
| Cytoplasmic droplet (%)                         | -9.08     | 0.00                   | 0.00    | -0.08   | 0.01                           |
| Immature sperm (#)                              | -19.69*   | 0.01                   | 0.03    | -0.09   | 0.00                           |
| Sperm chromatin stability assay                 |           |                        |         |         |                                |
| DNA fragmentation index (%)                     | -23.91    | 0.08                   | -0.13   |         |                                |
| High DNA stainability (%)                       | 0.58      | 0.00                   | 0.00    | 0.01    | 0.00                           |
|                                                 | 0.02      | 0.00                   | 0.00    | -0.03   | 0.01                           |

BW, birthweight; GA, gestational age; HC, head circumference; BL, birth length; PI, ponderal index.

\* $P < 0.1$ , \*\* $P < 0.05$ , \*\*\* $P < 0.01$ , \*\*\*\* $P < 0.001$ ; Adjusted model included age (years), smoking status (unexposed, passive exposure, current smoker), site (MI or TX, USA), race (white non-Hispanic, black non-Hispanic, Hispanic, other) and BMI (kg/m<sup>2</sup>).

<sup>a</sup>For these models, semen parameters were included from only the first semen sample.

**Supplementary Table SII Results of adjusted linear models assessing relation of semen quality<sup>a</sup> on pregnancy outcomes among female births (n = 116)**

| Semen analysis variable                         | BW (g)    | GA at delivery (weeks) | HC (cm) | BL (cm)  | PI (100 × BL/BW <sup>3</sup> ) |
|-------------------------------------------------|-----------|------------------------|---------|----------|--------------------------------|
| General characteristics                         |           |                        |         |          |                                |
| Volume (ml)                                     | 13.12     | 0.09                   | 0.03    | 0.03     | 0.01                           |
| Sperm concentration (×10 <sup>6</sup> /ml)      | -0.78     | 0.00                   | -0.01   | -0.01**  | 0.00**                         |
| Total sperm count (×10 <sup>6</sup> /ejaculate) | 0.03      | 0.00                   | 0.00    | 0.00     | 0.00                           |
| Hypo-osmotic swollen (%)                        | 6.68      | -0.01                  | 0.02    | -0.03    | 0.01**                         |
| Sperm motility (24 h)                           |           |                        |         |          |                                |
| Average path velocity (mm/s)                    | 6.04*     | 0.03*                  | -0.01   | 0.03     | 0.00                           |
| Straight line velocity (mm/s)                   | 5.71      | 0.03*                  | -0.02   | 0.03     | 0.00                           |
| Curvilinear velocity (mm/s)                     | 3.90*     | 0.02*                  | 0.00    | 0.01     | 0.00                           |
| Amplitude head displacement (mm)                | 61.16*    | 0.19                   | -0.25   | 0.18     | 0.01                           |
| Beat cross frequency (Hz)                       | 11.69*    | 0.04                   | 0.02    | 0.06     | 0.00                           |
| Straightness (%)                                | 5.31**    | 0.03***                | 0.00    | 0.02*    | 0.00                           |
| Linearity (%)                                   | 6.97*     | 0.04**                 | 0.00    | 0.04*    | 0.00                           |
| Percent motility (%)                            | -0.93     | 0.00                   | -0.02   | -0.02    | 0.00                           |
| Sperm head measurements                         |           |                        |         |          |                                |
| Length (mm)                                     | 356.09*   | 1.52*                  | 2.07*   | 2.18**   | -0.12                          |
| Area (mm <sup>2</sup> )                         | 34.16     | 0.24                   | 0.69**  | -0.11    | 0.04                           |
| Width (mm)                                      | -304.56   | -0.27                  | 0.89    | -2.70*   | 0.25                           |
| Elongation factor (%)                           | -18.16*   | -0.07*                 | -0.04   | -0.14**  | 0.01                           |
| Perimeter (mm)                                  | 153.40    | 0.65                   | 1.40**  | 0.50     | 0.03                           |
| Acrosome area of head (%)                       | -13.70    | -0.04                  | -0.09   | -0.10*   | 0.01                           |
| Morphology                                      |           |                        |         |          |                                |
| Strict criteria (%)                             | -9.24*    | -0.02                  | -0.05*  | -0.07**  | 0.00                           |
| Traditional normal (%)                          | -9.86**   | -0.02                  | -0.04*  | -0.06*** | 0.00                           |
| Amorphous (%)                                   | 8.91*     | 0.01                   | 0.00    | 0.05**   | 0.00                           |
| Round (%)                                       | 36.14     | -0.01                  | 0.24    | 0.10     | 0.01                           |
| Pyriform (%)                                    | 9.90      | 0.06                   | 0.06    | 0.11**   | -0.01                          |
| Bicephalic (%)                                  | 32.76     | -0.05                  | 0.22    | 0.08     | 0.01                           |
| Taper (%)                                       | 38.36**   | 0.07                   | -0.04   | 0.04     | 0.02**                         |
| Megalo head (%)                                 | 47.02*    | 0.01                   | 0.02    | 0.23     | 0.01                           |
| Micro head (%)                                  | 59.78*    | 0.20                   | -0.12   | 0.09     | 0.03                           |
| Neck/midpiece abnormalities (%)                 | 11.36**   | 0.04*                  | 0.07**  | 0.08***  | 0.00                           |
| Coiled tail (%)                                 | 4.90      | 0.01                   | 0.05*   | 0.05*    | 0.00                           |
| Other tail abnormalities (%)                    | 1.26      | -0.02                  | 0.10    | 0.00     | 0.00                           |
| Cytoplasmic droplet (%)                         | 34.96**** | 0.06                   | 0.02    | 0.21**** | 0.00                           |
| Immature sperm (#)                              | 27.37***  | -0.01                  | 0.05    | 0.10**   | 0.01                           |
| Sperm chromatin stability assay                 |           |                        |         |          |                                |
| DNA fragmentation index (%)                     | 4.61      | 0.02                   | 0.01    | 0.09**   | -0.01*                         |
| High DNA stainability (%)                       | 21.58**   | 0.01                   | 0.07    | 0.11**   | -0.01                          |

\*P < 0.1, \*\*P < 0.05, \*\*\*P < 0.01, \*\*\*\*P < 0.001; Adjusted model included age (years), smoking status (unexposed, passive exposure, current smoker), site (MI or TX, USA), race (white non-Hispanic, black non-Hispanic, Hispanic, other) and BMI (kg/m<sup>2</sup>).

<sup>a</sup>For these models, semen parameters were included from only the first semen sample.
